# Supplementary material
Source: PubMed Central journal article supplement (PMC7169945)
Supplement: NIHMS1563255-supplement-Suppl.pdf [file NIHMS1563255-supplement-Suppl.pdf]

## Supplementary Online Content

Nogueira L, Foerster C, Groopman J, Egner P, Koshiol J, Ferreccio C; for the Gallbladder Cancer Chile Working Group (GBCChWG). Association of aflatoxin and gallbladder cancer in Chile. *JAMA*. doi:10.1001/jama.2015.4559

**eList.** Gallbladder Cancer Chile Working Group (GBCChWG)

This supplementary material has been provided by the authors to give readers additional information about their work.

**eList. Gallbladder Cancer Chile Working Group (GBCChWG)**

**Santiago, Chile:** Juan Carlos Roa,<sup>1</sup> Juan Francisco Miquel,<sup>1</sup> Johanna Acevedo,<sup>1</sup> Paz Cook,<sup>1</sup> Carmen Gloria Aguayo,<sup>2</sup> Sergio Baez,<sup>2</sup> Alfonso Díaz,<sup>2</sup> Lorena Azócar,<sup>1</sup> Héctor Molina,<sup>1</sup> Carolina Miranda,<sup>1</sup> Claudia Castillo,<sup>1</sup> Andrea Tello,<sup>2</sup> Fernando Toledo,<sup>1</sup> Aniela Wozniak<sup>1</sup>

**Concepción, Chile:** Gonzalo Durán,<sup>3</sup> Carolina Paz Delgado,<sup>4</sup> Rodrigo Torres-Quevedo,<sup>3</sup> Susana Pineda,<sup>3</sup> Tiare de la Barra,<sup>3</sup> Cristian Reyes,<sup>3</sup> Cristina Alegría,<sup>3</sup> Claudia Aguayo<sup>3</sup>

**Temuco, Chile:** Héctor Losada,<sup>5,6</sup> Juan Carlos Arraya,<sup>5,6</sup> Enrique Bellolio,<sup>5,6</sup> Oscar Tapia,<sup>5</sup> Jaime López,<sup>5</sup> Karie Medina,<sup>5</sup> Paulina Barraza,<sup>5</sup> Sandra Catalán,<sup>5</sup> Pía Riquelme,<sup>5</sup> Lorena Órdenes,<sup>5</sup> Raúl Garcés,<sup>5</sup> Claudia Duarte<sup>5</sup>

**United States:** Allan Hildesheim,<sup>7</sup> Ann W. Hsing<sup>8</sup>

<sup>1</sup>School of Medicine, Pontificia Universidad Católica de Chile, Santiago, Chile

<sup>2</sup>Hospital Dr. Sotero del Río, Santiago, Chile

<sup>3</sup>Hospital Dr. Guillermo Grant Benavente, Concepción, Chile

<sup>4</sup>School of Medicine, Universidad de Concepción, Concepción, Chile

<sup>5</sup>Hospital Dr. Hernan Henríquez Aravena, Temuco, Chile

<sup>6</sup>Faculty de Medicine, Universidad de La Frontera, Temuco, Chile

<sup>7</sup>Division of Cancer Epidemiology and Genetics, National Cancer Institute, Rockville, Maryland

<sup>8</sup>Cancer Prevention Institute of California, Fremont, California
